# Supplementary material for: Facile fabrication of perovskite layers with large grains through a solvent exchange approach
Source: Royal Society of Chemistry journal article supplement (doi:10.1039/c7qi00685c), 2017-12-04
Supplement: c7qi00685c1.pdf [file c7qi00685c1.pdf]

## **Facile Fabrication of Perovskite Layers with Large Grain through Solvent Exchange Approach**

Ying-Ke Ren,<sup>a</sup> Xiao-Qiang Shi,<sup>a</sup> Xi-Hong Ding,<sup>a</sup> Jun Zhu,<sup>\*b</sup> Tasawar Hayat,<sup>c</sup> Ahmed  
Alsaedi,<sup>c</sup> Zhao-Qian Li,<sup>d</sup> Xiao-Xiao Xu,<sup>d</sup> Shang-Feng Yang,<sup>e</sup> and Song-Yuan Dai<sup>\*a,c,d</sup>

*<sup>a</sup>Beijing Key Laboratory of Novel Thin-Film Solar Cells, North China Electric Power University,  
Beijing, 102206, China*

*<sup>b</sup>Key Lab of Special Display Technology, Ministry of Education, National Engineering Lab of  
Special Display Technology, State Key Lab of Advanced Display Technology, Academy of Opto-  
Electronic Technology, Hefei University of Technology, Hefei, 230009, China*

*<sup>c</sup>NAAM Research Group, Department of Mathematics, Faculty of Science, King Abdulaziz  
University, Jeddah 21589, Saudi Arabia*

*<sup>d</sup>Key Laboratory of Photovoltaic and Energy Conservation Materials, Institute of Applied  
Technology, Hefei Institutes of Physical Science, Chinese Academy of Sciences, Hefei, 230031,  
China*

*<sup>e</sup>University of Science and Technology of China, Hefei 230026, China*

\*Corresponding author.

E-mail: sydai@ipp.ac.cn (SY Dai)

E-mail: zhujzhu@gmail.com (J Zhu)

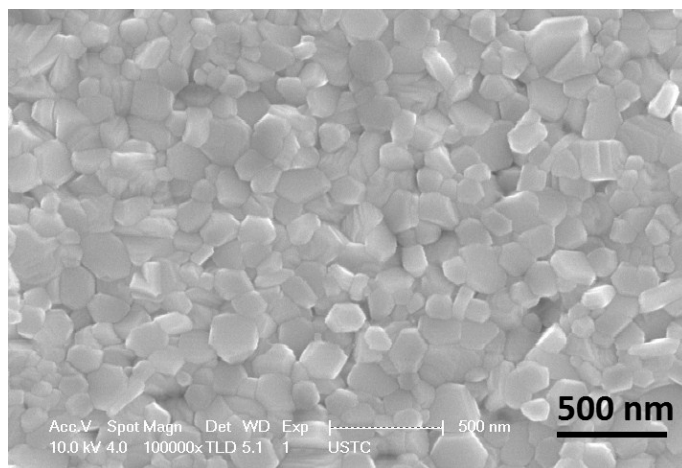

**Figure S1** Surface sectional SEM images of the perovskite films fabricated by CP methods.
